# Supplementary material for: Challenges and solutions for the analysis of in situ, in crystallo micro-spectrophotometric data
Source: PubMed Central journal article supplement (PMC4304683; doi:10.1107/s1399004714015107), 2015-01-01
Supplement: d-71-00027-sup1.pdf [file d-71-00027-sup1.pdf]

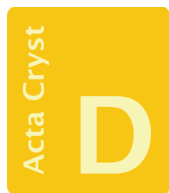

BIOLOGICAL  
CRYSTALLOGRAPHY

**Volume 71 (2015)**

**Supporting information for article:**

**Challenges and solutions for the analysis of *in situ, in crystallo*  
micro-spectrophotometric data**

**Florian S. N. Dworkowski, Michael A. Hough, Guillaume Pompidor and Martin  
R. Fuchs**

## Supporting information

**Table S1** Chromophore distribution in X-ray diffraction based PDB structures by year of deposition (as of January 27, 2014).

| Chromophore<br>containing<br>Xray structures | Fraction | Year | PLP  | NAD/NDP/NAP | FAD/FMN | Hem  | Mn   | Fe   | FeS  | SF4 | Co  | Ni  | Cu  | CLA/CHL<br>BCA/BCL | Ret | pterin | Lumi |     |     |
|----------------------------------------------|----------|------|------|-------------|---------|------|------|------|------|-----|-----|-----|-----|--------------------|-----|--------|------|-----|-----|
| 142                                          | 586      | 24%  | 1990 | 11          | 14      | 6    | 75   | 7    | 9    | 1   | 4   | 4   | 10  | 0                  | 0   | 1      |      |     |     |
| 292                                          | 1319     | 22%  | 1992 | 13          | 34      | 28   | 118  | 24   | 17   | 2   | 10  | 11  | 31  | 0                  | 2   | 2      |      |     |     |
| 642                                          | 2662     | 24%  | 1994 | 32          | 61      | 68   | 251  | 69   | 31   | 6   | 34  | 20  | 4   | 58                 | 0   | 6      | 2    |     |     |
| 1055                                         | 4475     | 23%  | 1996 | 48          | 126     | 121  | 354  | 139  | 57   | 12  | 46  | 27  | 12  | 96                 | 1   | 9      | 3    | 3   | 1   |
| 1739                                         | 7416     | 23%  | 1998 | 94          | 205     | 181  | 521  | 206  | 123  | 28  | 100 | 42  | 39  | 158                | 2   | 13     | 9    | 17  | 1   |
| 2757                                         | 11584    | 23%  | 2000 | 187         | 321     | 305  | 763  | 318  | 185  | 58  | 135 | 79  | 78  | 204                | 4   | 23     | 25   | 64  | 8   |
| 3910                                         | 16569    | 23%  | 2002 | 260         | 479     | 453  | 1011 | 471  | 254  | 95  | 180 | 103 | 113 | 278                | 7   | 37     | 48   | 96  | 25  |
| 5500                                         | 24241    | 22%  | 2004 | 340         | 720     | 628  | 1323 | 699  | 367  | 144 | 245 | 168 | 179 | 357                | 16  | 50     | 74   | 124 | 66  |
| 7394                                         | 34103    | 21%  | 2006 | 431         | 993     | 912  | 1647 | 966  | 524  | 208 | 300 | 228 | 273 | 459                | 23  | 66     | 91   | 127 | 146 |
| 9376                                         | 45999    | 20%  | 2008 | 543         | 1289    | 1224 | 2035 | 1231 | 677  | 261 | 345 | 280 | 372 | 566                | 29  | 90     | 102  | 140 | 192 |
| 10585                                        | 52730    | 20%  | 2009 | 576         | 1473    | 1428 | 2245 | 1374 | 768  | 311 | 384 | 336 | 454 | 632                | 37  | 92     | 115  | 162 | 198 |
| 11861                                        | 59899    | 19%  | 2010 | 599         | 1643    | 1635 | 2553 | 1531 | 846  | 357 | 440 | 379 | 534 | 715                | 45  | 93     | 123  | 169 | 199 |
| 13154                                        | 67312    | 19%  | 2011 | 634         | 1859    | 1800 | 2795 | 1718 | 947  | 390 | 486 | 435 | 604 | 814                | 45  | 97     | 140  | 172 | 218 |
| 14481                                        | 75267    | 19%  | 2012 | 668         | 2052    | 2022 | 3041 | 1917 | 1043 | 421 | 531 | 478 | 696 | 888                | 52  | 102    | 154  | 181 | 235 |
| 15211                                        | 80231    | 18%  | 2013 | 684         | 2152    | 2112 | 3240 | 2036 | 1077 | 436 | 556 | 505 | 748 | 920                | 54  | 108    | 161  | 185 | 237 |
| 15213                                        | 80250    | 18%  | 2014 | 684         | 2152    | 2112 | 3241 | 2036 | 1077 | 436 | 556 | 505 | 748 | 921                | 54  | 108    | 161  | 185 | 237 |

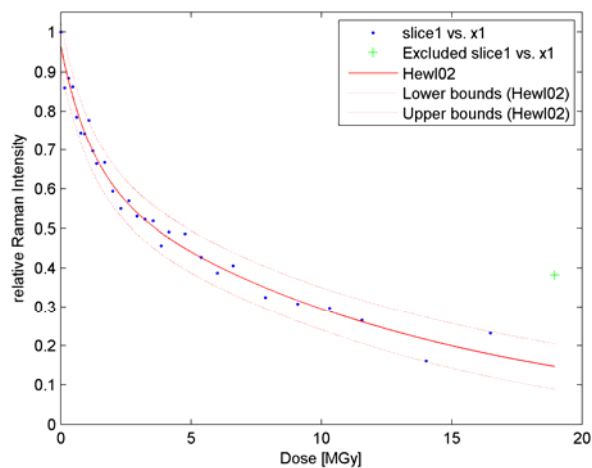

General model Exp2:

$$f(x) = a \cdot \exp(b \cdot x) + c \cdot \exp(d \cdot x)$$

Coefficients (with 95% confidence bounds):

$$\begin{aligned} a &= 0.3193 & (0.2322, 0.4064) \\ b &= -0.8496 & (-1.268, -0.431) \\ c &= 0.645 & (0.5543, 0.7357) \\ d &= -0.07829 & (-0.09676, -0.05982) \end{aligned}$$

Goodness of fit:

$$\text{Adjusted R-square: } 0.9809$$

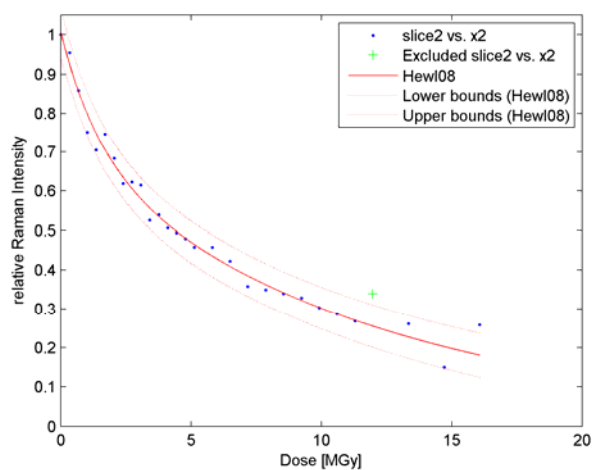

General model Exp2:

$$f(x) = a \cdot \exp(b \cdot x) + c \cdot \exp(d \cdot x)$$

Coefficients (with 95% confidence bounds):

$$\begin{aligned} a &= 0.2824 & (0.1714, 0.3935) \\ b &= -0.7433 & (-1.226, -0.2609) \\ c &= 0.7268 & (0.611, 0.8426) \\ d &= -0.0893 & (-0.1086, -0.06999) \end{aligned}$$

Goodness of fit:

$$\text{Adjusted R-square: } 0.9839$$

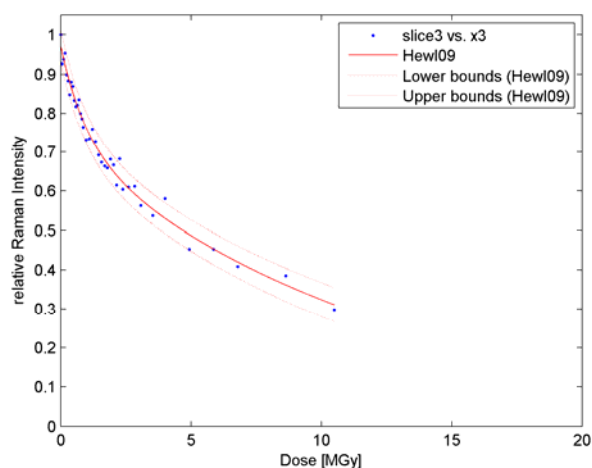

General model Exp2:

$$f(x) = a \cdot \exp(b \cdot x) + c \cdot \exp(d \cdot x)$$

Coefficients (with 95% confidence bounds):

$$\begin{aligned} a &= 0.2589 & (0.1937, 0.324) \\ b &= -0.9611 & (-1.349, -0.5736) \\ c &= 0.7138 & (0.6428, 0.7847) \\ d &= -0.08017 & (-0.09663, -0.06371) \end{aligned}$$

Goodness of fit:

$$\text{Adjusted R-square: } 0.9871$$

**Figure S1** Fit of double exponential to decay data of S-S bonds in HEWL upon X-ray irradiation at 12.4 keV (top), 8.0 keV (middle), and 15.0 keV (bottom). Measured by non-resonance Raman spectroscopy at 785 nm Laser excitation. Decay of peak at 507  $\text{cm}^{-1}$  is plotted against received dose. For fitting the Matlab Curve Fitting Toolbox was used.
